# Supplementary material for: Cyano-bridged polynuclear coordination compounds derived from paramagnetic [Mn(H2daptsc)]2+ and photochromic [Fe(CN)5NO]2− building blocks
Source: Royal Society of Chemistry journal article supplement (doi:10.1039/d0ce01863e), 2021-01-01
Supplement: d0ce01863e1.pdf [file d0ce01863e1.pdf]

Electronic Supplementary Material (ESI) for CrystEngComm.  
This journal is © The Royal Society of Chemistry 2015

## Electronic Supplementary Information

The first cyano-bridged polynuclear coordination compounds derived from paramagnetic  $[\text{Mn}(\text{H}_2\text{daptsc})]^{2+}$  and photochromic  $[\text{Fe}(\text{CN})_5\text{NO}]^{2-}$  building blocks

Valentina D. Sasnovskaya,<sup>a</sup> Leokadiya V. Zorina,<sup>b\*</sup> Sergey V. Simonov,<sup>b</sup> Artem D. Talantsev,<sup>a</sup> Roman B. Morgunov,<sup>a</sup> Atrem A. Mikhailov,<sup>c</sup> Gennadiy A. Kostin,<sup>c</sup> and Eduard B. Yagubskii<sup>a\*</sup>

<sup>a</sup> Institute of Problems of Chemical Physics, RAS, 1 Academician Semenov ave., Chernogolovka, Moscow District, 142432 Russia. E-mail: yagubski@gmail.com

<sup>b</sup> Institute of Solid State Physics, RAS, 2 Academician Ossipyan str., Chernogolovka, Moscow District, 142432 Russia. E-mail: zorina@issp.ac.ru

<sup>c</sup> Nikolaev Institute of Inorganic Chemistry, SB RAS, 3 Academician Lavrentieva ave., Novosibirsk, 630090 Russia

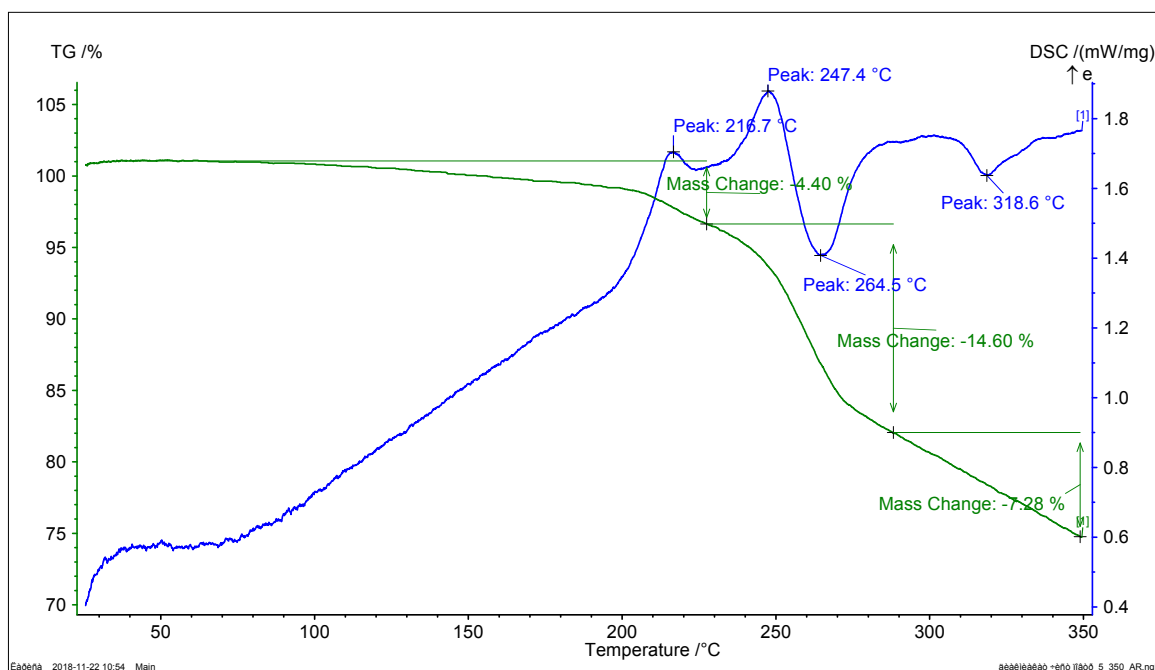

Fig S1. TG-DSC curves for complex 1.

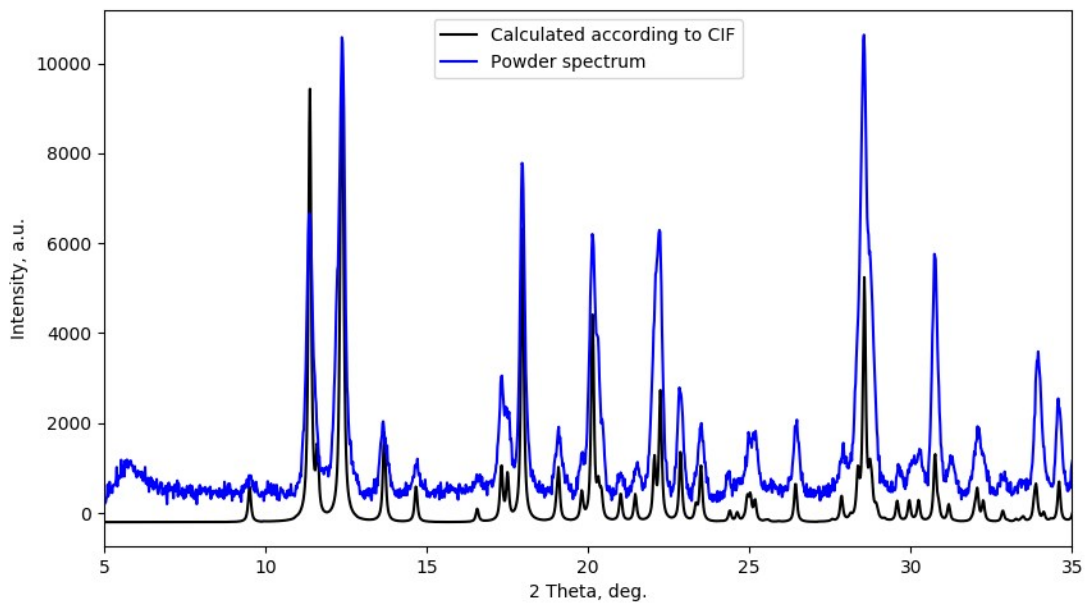

Fig. S2. Powder X-ray diffraction profile of **1** together with a simulation from the single crystal data.

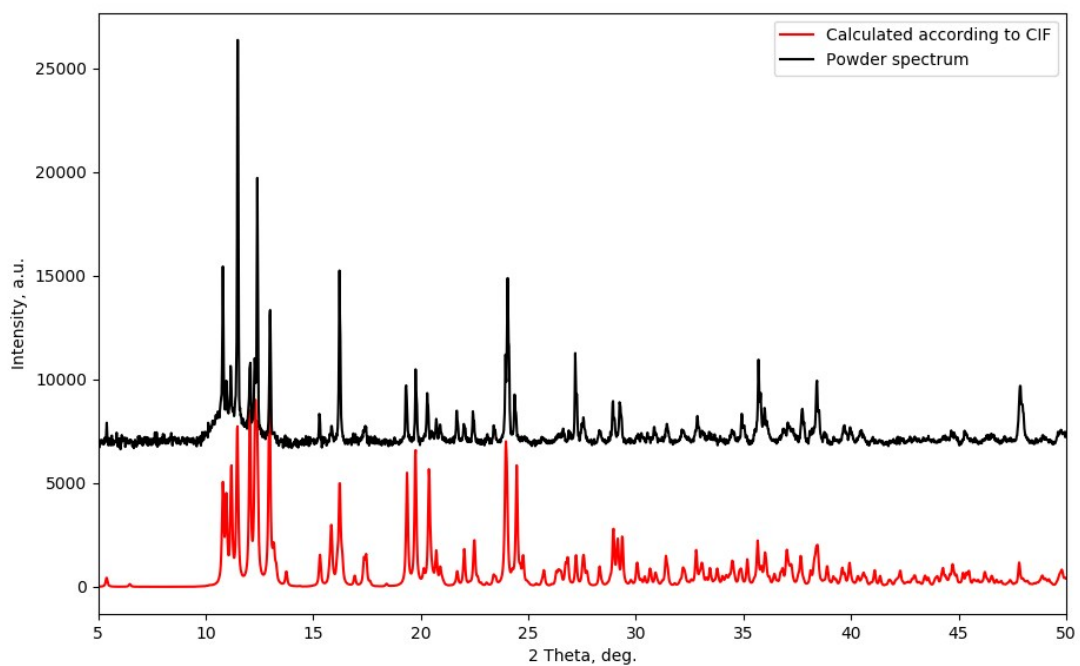

Fig. S3. Powder X-ray diffraction profile of **4** together with a simulation from the single crystal data.

Table S1. Selected bond lengths (Å) and angles (°) in **1** and **3**.

| <b>1</b>                                     |                       | <b>3</b>                                     |                           |                                              |                           |
|----------------------------------------------|-----------------------|----------------------------------------------|---------------------------|----------------------------------------------|---------------------------|
| Mn(1)-S(1)                                   | 2.6075(7)             | Mn(1)-S(1)                                   | 2.6315(4)                 | Mn(2)-S(3)                                   | 2.6638(4)                 |
| Mn(1)-S(2)                                   | 2.6652(7)             | Mn(1)-S(2)                                   | 2.6380(5)                 | Mn(2)-S(4)                                   | 2.6437(4)                 |
| Mn(1)-N(2)                                   | 2.345(2)              | Mn(1)-N(2)                                   | 2.3944(12)                | Mn(2)-N(22)                                  | 2.3616(12)                |
| Mn(1)-N(4)                                   | 2.357(2)              | Mn(1)-N(4)                                   | 2.3505(12)                | Mn(2)-N(24)                                  | 2.3783(12)                |
| Mn(1)-N(3)                                   | 2.269(2)              | Mn(1)-N(3)                                   | 2.2823(12)                | Mn(2)-N(23)                                  | 2.2916(12)                |
| Mn(1)-N(12)                                  | 2.277(2)              | Mn(1)-N(12)                                  | 2.2337(13)                | Mn(2)-N(32)                                  | 2.2159(13)                |
| Mn(1)-N(13) <sup>a</sup>                     | 2.254(2)              | Mn(1)-N(13) <sup>b</sup>                     | 2.2129(13)                | Mn(2)-N(33) <sup>b</sup>                     | 2.2313(13)                |
| Fe(1)-C <sub>CN</sub>                        | 1.932(2)-<br>1.937(2) | Fe(1)-C <sub>CN</sub>                        | 1.9212(13)-<br>1.9445(15) | Fe(2)-C <sub>CN</sub>                        | 1.9315(14)-<br>1.9424(16) |
| Fe(1)-N(17)                                  | 1.657(2)              | Fe(1)-N(17)                                  | 1.6609(13)                | Fe(2)-N(37)                                  | 1.6628(13)                |
| S(1)-Mn(1)-S(2)                              | 76.52(2)              | S(1)-Mn(1)-S(2)                              | 78.85(1)                  | S(3)-Mn(2)-S(4)                              | 78.48(1)                  |
| S(1)-Mn(1)-N(2)                              | 73.56(5)              | S(1)-Mn(1)-N(2)                              | 72.64(3)                  | S(3)-Mn(2)-N(22)                             | 72.49(3)                  |
| S(2)-Mn(1)-N(4)                              | 72.44(5)              | S(2)-Mn(1)-N(4)                              | 72.92(3)                  | S(4)-Mn(2)-N(24)                             | 72.76(3)                  |
| N(2)-Mn(1)-N(3)                              | 68.68(7)              | N(2)-Mn(1)-N(3)                              | 68.38(4)                  | N(22)-Mn(2)-N(23)                            | 68.30(4)                  |
| N(4)-Mn(1)-N(3)                              | 69.19(7)              | N(4)-Mn(1)-N(3)                              | 68.83(4)                  | N(24)-Mn(2)-N(23)                            | 68.22(4)                  |
| N(12)-Mn(1)-N(13) <sup>a</sup>               | 168.1(1)              | N(12)-Mn(1)-N(13) <sup>b</sup>               | 170.69(5)                 | N(32)-Mn(2)-N(33) <sup>b</sup>               | 171.17(5)                 |
| Mn(1)-N(12)-C(12)                            | 138.3(2)              | Mn(1)-N(12)-C(12)                            | 145.49(12)                | Mn(2)-N(32)-C(32)                            | 157.00(12)                |
| Mn(1)-N(13) <sup>a</sup> -C(13) <sup>a</sup> | 145.4(2)              | Mn(1)-N(13) <sup>b</sup> -C(13) <sup>b</sup> | 155.88(12)                | Mn(2)-N(33) <sup>b</sup> -C(33) <sup>b</sup> | 144.71(12)                |
| Fe(1)-C(12)-N(12)                            | 174.7(2)              | Fe(1)-C(12)-N(12)                            | 173.17(14)                | Fe(2)-C(32)-N(32)                            | 177.51(13)                |
| Fe(1)-C(13)-N(13)                            | 176.9(2)              | Fe(1)-C(13)-N(13)                            | 176.79(14)                | Fe(2)-C(33)-N(33)                            | 175.33(14)                |
| C(12)-Fe(1)-C(13)                            | 172.6(1)              | C(12)-Fe(1)-C(13)                            | 170.59(6)                 | C(32)-Fe(2)-C(33)                            | 169.96(6)                 |

Symmetry codes: <sup>a</sup> (x, y, z+1), <sup>b</sup> (x-1, y, z).Table S2. Selected bond lengths (Å) and angles (°) in **2**.

| <b>2</b>                                    |                       |                                              |                       |                                              |                       |
|---------------------------------------------|-----------------------|----------------------------------------------|-----------------------|----------------------------------------------|-----------------------|
| Mn(1)-S(1)                                  | 2.628(2)              | Mn(2)-S(3)                                   | 2.631(2)              | Mn(3)-S(5)                                   | 2.625(2)              |
| Mn(1)-S(2)                                  | 2.646(2)              | Mn(2)-S(4)                                   | 2.653(2)              | Mn(3)-S(6)                                   | 2.626(2)              |
| Mn(1)-N(2)                                  | 2.353(5)              | Mn(2)-N(22)                                  | 2.372(5)              | Mn(3)-N(42)                                  | 2.366(5)              |
| Mn(1)-N(4)                                  | 2.345(5)              | Mn(2)-N(24)                                  | 2.346(5)              | Mn(3)-N(44)                                  | 2.358(5)              |
| Mn(1)-N(3)                                  | 2.266(5)              | Mn(2)-N(23)                                  | 2.280(5)              | Mn(3)-N(43)                                  | 2.266(5)              |
| Mn(1)-N(8)                                  | 2.269(5)              | Mn(2)-N(28)                                  | 2.264(5)              | Mn(3)-N(48)                                  | 2.288(5)              |
| Mn(1)-N(9) <sup>c</sup>                     | 2.295(5)              | Mn(2)-N(29) <sup>c</sup>                     | 2.229(5)              | Mn(3)-N(49) <sup>c</sup>                     | 2.293(5)              |
| Fe(1)-C <sub>CN</sub>                       | 1.936(6)-<br>1.945(6) | Fe(2)-C <sub>CN</sub>                        | 1.926(6)-<br>1.945(6) | Fe(3)-C <sub>CN</sub>                        | 1.937(5)-<br>1.956(6) |
| Fe(1)-N(13)                                 | 1.655(5)              | Fe(2)-N(33)                                  | 1.666(5)              | Fe(3)-N(53)                                  | 1.665(5)              |
| S(1)-Mn(1)-S(2)                             | 75.42(5)              | S(3)-Mn(2)-S(4)                              | 75.91(5)              | S(5)-Mn(3)-S(6)                              | 76.28(5)              |
| S(1)-Mn(1)-N(2)                             | 73.6(1)               | S(3)-Mn(2)-N(22)                             | 73.5(1)               | S(5)-Mn(3)-N(42)                             | 72.8(1)               |
| S(2)-Mn(1)-N(4)                             | 73.3(1)               | S(4)-Mn(2)-N(24)                             | 73.4(1)               | S(6)-Mn(3)-N(44)                             | 72.7(1)               |
| N(2)-Mn(1)-N(3)                             | 68.8(2)               | N(22)-Mn(2)-N(23)                            | 68.3(2)               | N(42)-Mn(3)-N(43)                            | 69.38(16)             |
| N(4)-Mn(1)-N(3)                             | 68.9(2)               | N(24)-Mn(2)-N(23)                            | 68.9(2)               | N(44)-Mn(3)-N(43)                            | 69.03(16)             |
| N(8)-Mn(1)-N(9) <sup>c</sup>                | 173.0(2)              | N(28)-Mn(2)-N(29) <sup>c</sup>               | 174.5(2)              | N(48)-Mn(3)-N(49) <sup>c</sup>               | 167.5(2)              |
| Mn(1)-N(8)-C(12)                            | 151.5(5)              | Mn(2)-N(28)-C(32)                            | 143.4(5)              | Mn(3)-N(48)-C(52)                            | 152.9(4)              |
| Mn(1)-N(9) <sup>c</sup> -C(13) <sup>c</sup> | 140.3(5)              | Mn(2)-N(29) <sup>c</sup> -C(33) <sup>c</sup> | 154.2(5)              | Mn(3)-N(49) <sup>c</sup> -C(53) <sup>c</sup> | 139.3(5)              |
| Fe(1)-C(12)-N(8)                            | 175.4(5)              | Fe(2)-C(32)-N(28)                            | 174.2(5)              | Fe(3)-C(52)-N(48)                            | 175.7(5)              |
| Fe(1)-C(13)-N(9)                            | 172.6(5)              | Fe(2)-C(33)-N(29)                            | 175.3(6)              | Fe(3)-C(53)-N(49)                            | 173.2(5)              |
| C(12)-Fe(1)-C(13)                           | 170.9(3)              | C(32)-Fe(2)-C(33)                            | 171.3(3)              | C(52)-Fe(3)-C(53)                            | 171.4(2)              |

Symmetry code: <sup>c</sup> (x, y-1, z).

Table S3. Selected bond lengths (Å) and angles (°) in **4**.

| <b>4</b>              |                   |                   |           |
|-----------------------|-------------------|-------------------|-----------|
| Mn(1)-S(1)            | 2.6494(9)         | Mn(2)-S(3)        | 2.6683(9) |
| Mn(1)-S(2)            | 2.6458(9)         | Mn(2)-S(4)        | 2.6325(9) |
| Mn(1)-N(2)            | 2.364(3)          | Mn(2)-N(12)       | 2.337(3)  |
| Mn(1)-N(4)            | 2.337(3)          | Mn(2)-N(14)       | 2.330(2)  |
| Mn(1)-N(3)            | 2.290(2)          | Mn(2)-N(13)       | 2.279(2)  |
| Mn(1)-N(21)           | 2.224(3)          | Mn(2)-N(22)       | 2.264(3)  |
| Mn(1)-Cl(1)           | 2.5626(9)         | Mn(2)-Cl(2)       | 2.5824(9) |
| Fe(1)-C <sub>CN</sub> | 1.930(3)-1.949(3) | Fe(1)-N(26)       | 1.656(3)  |
| S(1)-Mn(1)-S(2)       | 77.27(3)          | S(3)-Mn(2)-S(4)   | 76.41(3)  |
| S(1)-Mn(1)-N(2)       | 72.42(7)          | S(3)-Mn(2)-N(12)  | 72.71(6)  |
| S(2)-Mn(1)-N(4)       | 73.37(6)          | S(4)-Mn(2)-N(14)  | 73.47(6)  |
| N(2)-Mn(1)-N(3)       | 68.40(9)          | N(12)-Mn(2)-N(13) | 68.88(9)  |
| N(4)-Mn(1)-N(3)       | 68.67(9)          | N(14)-Mn(2)-N(13) | 68.84(9)  |
| N(21)-Mn(1)-Cl(1)     | 170.25(8)         | N(22)-Mn(2)-Cl(2) | 170.14(8) |
| Mn(1)-N(21)-C(41)     | 152.6(3)          | Mn(2)-N(22)-C(42) | 143.2(3)  |
| Fe(1)-C(41)-N(21)     | 175.8(3)          | Fe(1)-C(42)-N(22) | 174.9(3)  |
| C(41)-Fe(1)-C(42)     | 172.22(13)        | Fe(1)-N(26)-O(1)  | 177.8(3)  |

Table S4. Selected bond lengths (Å) and angles (°) in **5** and **6**.

| <b>5</b>                                     |                   | <b>6</b>                                     |                       |
|----------------------------------------------|-------------------|----------------------------------------------|-----------------------|
| Mn(1)-S(1)                                   | 2.6309(9)         | Mn(1)-S(1)                                   | 2.6973(3)             |
| Mn(1)-S(2)                                   | 2.6108(9)         | Mn(1)-S(2)                                   | 2.6265(3)             |
| Mn(1)-N(2)                                   | 2.356(2)          | Mn(1)-N(2)                                   | 2.3873(9)             |
| Mn(1)-N(4)                                   | 2.348(2)          | Mn(1)-N(4)                                   | 2.3763(10)            |
| Mn(1)-N(3)                                   | 2.265(2)          | Mn(1)-N(3)                                   | 2.2960(9)             |
| Mn(1)-N(12)                                  | 2.244(3)          | Mn(1)-N(12)                                  | 2.2287(10)            |
| Mn(1)-N(13) <sup>a</sup>                     | 2.267(3)          | Mn(1)-N(14) <sup>b</sup>                     | 2.1836(10)            |
| Fe(1)-C <sub>CN</sub>                        | 1.933(3)-1.946(3) | Fe(1)-C <sub>CN</sub>                        | 1.9264(11)-1.9478(12) |
| Fe(1)-N(17)                                  | 1.660(3)          | Fe(1)-N(17)                                  | 1.6657(10)            |
| S(1)-Mn(1)-S(2)                              | 76.23(3)          | S(1)-Mn(1)-S(2)                              | 80.34(1)              |
| S(1)-Mn(1)-N(2)                              | 72.86(6)          | S(1)-Mn(1)-N(2)                              | 71.60(2)              |
| S(2)-Mn(1)-N(4)                              | 73.61(6)          | S(2)-Mn(1)-N(4)                              | 72.79(2)              |
| N(2)-Mn(1)-N(3)                              | 69.18(9)          | N(2)-Mn(1)-N(3)                              | 67.85(3)              |
| N(4)-Mn(1)-N(3)                              | 68.52(9)          | N(4)-Mn(1)-N(3)                              | 68.32(3)              |
| N(12)-Mn(1)-N(13) <sup>a</sup>               | 170.8(1)          | N(12)-Mn(1)-N(14) <sup>b</sup>               | 167.97(4)             |
| Mn(1)-N(12)-C(12)                            | 153.2(3)          | Mn(1)-N(12)-C(12)                            | 154.83(9)             |
| Mn(1)-N(13) <sup>a</sup> -C(13) <sup>a</sup> | 150.2(2)          | Mn(1)-N(14) <sup>b</sup> -C(14) <sup>b</sup> | 160.71(10)            |
| Fe(1)-C(12)-N(12)                            | 178.3(3)          | Fe(1)-C(12)-N(12)                            | 176.21(10)            |
| Fe(1)-C(13)-N(13)                            | 176.3(3)          | Fe(1)-C(14)-N(14)                            | 178.31(10)            |
| C(12)-Fe(1)-C(13)                            | 171.5(1)          | C(12)-Fe(1)-C(14)                            | 88.24(5)              |

Symmetry codes: <sup>a</sup> (x, y, z-1), <sup>b</sup> (0.5-x, y-0.5, 0.5-z).

Table S5. Hydrogen bond geometry in **1**.

| D   | H   | A   | Symmetry code for A | D-H, Å   | H...A, Å | D...A, Å | D-H...A, ° |
|-----|-----|-----|---------------------|----------|----------|----------|------------|
| N1  | H1  | N14 | 1+x, 1+y, 1+z       | 0.82(3)  | 2.24(3)  | 3.030(4) | 161(3)     |
| N6  | H6A | N14 | 1+x, 1+y, 1+z       | 0.82(4)  | 2.28(4)  | 3.053(4) | 156(4)     |
| N5  | H5  | N15 | x-1, y-1, z         | 0.82(3)  | 2.17(3)  | 2.936(4) | 157(3)     |
| N7  | H7A | N15 | x-1, y-1, z         | 0.86(4)  | 2.42(4)  | 3.157(4) | 144(4)     |
| N6  | H6B | N16 | x, 1+y, 1+z         | 0.84(4)  | 2.15(4)  | 2.925(5) | 155(4)     |
| O1W | H1W | S1  | x, y, z-1           | 0.85(9)  | 2.90(7)  | 3.672(6) | 151(6)     |
| O1W | H2W | N14 | x, 1+y, z           | 0.86(10) | 2.27(12) | 2.982(7) | 140(10)    |
| N7  | H7A | O1W | x-1, y-1, z         | 0.86(4)  | 2.37(4)  | 3.091(7) | 143(4)     |
| O1S | H1S | N12 | x, y, z             | 0.88(9)  | 2.29(11) | 3.113(9) | 154(12)    |
| C7  | H7  | O1S | x, y-1, z           | 0.95     | 2.34     | 3.268(9) | 165        |

Table S6. Hydrogen bond geometry in **2**.

| D   | H    | A   | Symmetry code for A | D-H, Å  | H...A, Å | D...A, Å  | D-H...A, ° | type       |
|-----|------|-----|---------------------|---------|----------|-----------|------------|------------|
| N1  | H1   | N11 | 1+x, y, z           | 0.85(5) | 2.13(5)  | 2.938(8)  | 157(6)     | intralayer |
| N6  | H6A  | N11 | 1+x, y, z           | 0.85(6) | 2.24(7)  | 3.026(7)  | 153(6)     | intralayer |
| N6  | H6B  | O3S | 1+x, y, z           | 0.84(3) | 2.18(4)  | 2.975(7)  | 156(7)     |            |
| N5  | H5   | N10 | x-1, y-1, z         | 0.83(5) | 2.27(5)  | 2.976(8)  | 143(4)     | intralayer |
| N7  | H7A  | N10 | x-1, y-1, z         | 0.84(6) | 2.25(6)  | 2.988(8)  | 147(6)     | intralayer |
| N7  | H7B  | O2S | x, y, z             | 0.85(4) | 2.03(4)  | 2.876(7)  | 177(12)    |            |
| N21 | H21  | N31 | x-1, y-1, z         | 0.84(5) | 2.18(5)  | 2.936(8)  | 151(6)     | intralayer |
| N26 | H26A | N31 | x-1, y-1, z         | 0.84(7) | 2.24(7)  | 3.027(7)  | 156(6)     | intralayer |
| N26 | H26B | O4S | x-1, y-1, z         | 0.84(3) | 2.18(4)  | 2.947(7)  | 152(8)     |            |
| N25 | H25  | N30 | 1+x, y, z           | 0.83(5) | 2.24(5)  | 3.009(8)  | 155(6)     | intralayer |
| N27 | H27A | N30 | 1+x, y, z           | 0.84(6) | 2.17(5)  | 2.977(9)  | 160(5)     | intralayer |
| N27 | H27B | O1S | x, y, z             | 0.85(3) | 2.05(4)  | 2.889(7)  | 175(7)     |            |
| N41 | H41  | N12 | x,y,1+z             | 0.84(5) | 2.29(6)  | 3.052(7)  | 152(6)     | interlayer |
| N46 | H46A | N12 | x,y,1+z             | 0.84(5) | 2.51(5)  | 3.297(8)  | 156(6)     | interlayer |
| N46 | H46B | O7S | x,y,1+z             | 0.84(6) | 2.05(6)  | 2.872(7)  | 166(6)     |            |
| N45 | H45  | N32 | x-1, y-1, z         | 0.83(5) | 2.25(6)  | 3.008(7)  | 152(6)     | interlayer |
| N47 | H47A | N32 | x-1, y-1, z         | 0.85(3) | 2.32(3)  | 3.108(7)  | 154(6)     | interlayer |
| C46 | H46  | N51 | 1+x, y, z           | 0.95    | 2.45     | 3.358(9)  | 159        | intralayer |
| C47 | H47  | N28 | x, y, z             | 0.95    | 2.59     | 3.352(7)  | 137        | interlayer |
| O1S | H1S  | O1  | x, y, z             | 0.82(4) | 2.44(2)  | 3.071(8)  | 135(1)     |            |
| O2S | H2S  | O2  | x, y, z             | 0.81(3) | 2.31(2)  | 3.095(8)  | 162(2)     |            |
| O7S | H7S  | N9  | x, y, z             | 0.82(6) | 2.46(7)  | 3.238(8)  | 158(9)     |            |
| O8S | H8S  | N28 | x, y, z             | 0.83(4) | 2.41(3)  | 3.153(9)  | 150(1)     |            |
| O1S | H1S  | O6S | x, y, z             | 0.82(4) | 2.09(3)  | 2.773(9)  | 142(1)     |            |
| O3S | H3S  | O2S | x, y, z             | 0.82(2) | 2.08(3)  | 2.689(7)  | 131(2)     |            |
| O5S | H5S  | O4S | x, y, z             | 0.81(4) | 1.88(4)  | 2.689(10) | 171(1)     |            |
| O6S | H6S  | O3S | x, y, z             | 0.81(3) | 2.08(2)  | 2.680(9)  | 131(2)     |            |
| O4S | H4S  | O1S | x, y, z             | 0.83(4) | 1.89(4)  | 2.698(7)  | 168(2)     |            |
| C48 | H48  | O8S | x, y, z             | 0.95    | 2.37     | 3.291(9)  | 164        |            |

Table S7. Hydrogen bond geometry in **3**.

| D   | H    | A   | Symmetry code for A | D-H, Å  | H...A, Å | D...A, Å | D-H...A, ° | type       |
|-----|------|-----|---------------------|---------|----------|----------|------------|------------|
| N1  | H1   | N14 | $x, 1/2-y, 1/2+z$   | 0.82(2) | 2.15(2)  | 2.936(2) | 160(2)     | intralayer |
| N6  | H6A  | N14 | $x, 1/2-y, 1/2+z$   | 0.86(2) | 2.35(2)  | 3.120(2) | 150(2)     | intralayer |
| N6  | H6B  | N35 | $x, 1/2-y, 1/2+z$   | 0.81(2) | 2.37(2)  | 3.150(2) | 164(2)     | interlayer |
| N5  | H5   | N15 | $x-1, 1/2-y, z-1/2$ | 0.82(2) | 2.08(2)  | 2.869(2) | 162(2)     | intralayer |
| N7  | H7A  | N15 | $x-1, 1/2-y, z-1/2$ | 0.85(2) | 2.35(2)  | 3.099(2) | 148(2)     | intralayer |
| N21 | H21  | O1W | $x-1, 1/2-y, z-1/2$ | 0.82(2) | 2.00(2)  | 2.782(2) | 160(2)     |            |
| N26 | H26A | O1W | $x-1, 1/2-y, z-1/2$ | 0.82(2) | 2.32(2)  | 3.046(2) | 148(2)     |            |
| N26 | H26B | S1  | $-x, y-1/2, 1/2-z$  | 0.82(3) | 2.71(3)  | 3.515(2) | 169(2)     | interlayer |
| N25 | H25  | N34 | $1-x, -y, 1-z$      | 0.82(2) | 2.10(1)  | 2.893(2) | 162(2)     | intralayer |
| N27 | H27A | N34 | $1-x, -y, 1-z$      | 0.82(2) | 2.51(2)  | 3.201(2) | 143(2)     | intralayer |
| N27 | H27B | N16 | $1-x, -y, 1-z$      | 0.82(2) | 2.14(2)  | 2.944(2) | 167(2)     | interlayer |
| C28 | H28  | N12 | $x, y, z$           | 0.95    | 2.46     | 3.267(2) | 143        | interlayer |
| O1W | H1W  | O1S | $x, y, z$           | 0.84(2) | 2.02(2)  | 2.839(2) | 166(2)     |            |
| O1W | H2W  | N35 | $x, 1/2-y, 1/2+z$   | 0.85(2) | 2.08(2)  | 2.862(2) | 153(2)     |            |
| O1S | H1S  | N32 | $1-x, 1/2+y, 1/2-z$ | 0.85(3) | 2.51(2)  | 3.149(2) | 133(2)     |            |

Table S8. Hydrogen bond geometry in **4**.

| D     | H      | A     | Symmetry code for A | D-H, Å  | H...A, Å | D...A, Å | D-H...A, ° |
|-------|--------|-------|---------------------|---------|----------|----------|------------|
| N(1)  | H(1)   | N(23) | $2-x, 1-y, -z$      | 0.82(4) | 2.33(4)  | 3.075(4) | 152(4)     |
| N(6)  | H(6A)  | N(23) | $2-x, 1-y, -z$      | 0.80(4) | 2.36(4)  | 3.066(5) | 148(4)     |
| N(6)  | H(6B)  | N(25) | $1+x, y, z$         | 0.80(4) | 2.60(4)  | 3.241(5) | 139(4)     |
| N(5)  | H(5)   | Cl(1) | $2-x, 1-y, 1-z$     | 0.80(3) | 2.46(4)  | 3.188(3) | 153(4)     |
| N(7)  | H(7A)  | Cl(1) | $2-x, 1-y, 1-z$     | 0.85(4) | 2.51(4)  | 3.264(3) | 149(4)     |
| N(7)  | H(7B)  | Cl(2) | $2-x, -y, -z$       | 0.85(5) | 2.45(5)  | 3.268(3) | 164(4)     |
| N(11) | H(11)  | N(24) | $2-x, -y, -z$       | 0.83(4) | 2.20(4)  | 2.970(4) | 154(4)     |
| N(16) | H(16A) | N(24) | $2-x, -y, -z$       | 0.82(5) | 2.27(5)  | 3.005(5) | 149(4)     |
| N(15) | H(15)  | Cl(2) | $1-x, -y, -1-z$     | 0.80(3) | 2.48(3)  | 3.222(3) | 155(3)     |
| N(17) | H(17A) | Cl(2) | $1-x, -y, -1-z$     | 0.82(4) | 2.46(5)  | 3.208(3) | 153(5)     |
| N(17) | H(17B) | Cl(1) | $2-x, 1-y, -z$      | 0.83(5) | 2.40(5)  | 3.215(3) | 166(4)     |
| C(11) | H(11B) | Cl(1) | $x-1, y, z$         | 0.98    | 2.79     | 3.721(4) | 159        |
| C(23) | H(23B) | S(1)  | $2-x, -y, -z$       | 0.98    | 2.90     | 3.679(3) | 137        |
| C(23) | H(23C) | N(24) | $x, y, z$           | 0.98    | 2.61     | 3.488(5) | 149        |
| C(31) | H(31B) | Cl(2) | $x-1, y, z$         | 0.98    | 2.67     | 3.571(4) | 154        |

Table S9. Hydrogen bond geometry in **5**.

| D   | H    | A   | Symmetry code for A | D-H, Å  | H...A, Å | D...A, Å | D-H...A, ° |
|-----|------|-----|---------------------|---------|----------|----------|------------|
| N6  | H6A  | N16 | x, y-1, z           | 0.83(5) | 2.30(5)  | 2.931(4) | 133(4)     |
| N7  | H7B  | N13 | 1+x, y, z-1         | 0.81(4) | 2.38(4)  | 3.133(4) | 153(4)     |
| N1  | H1   | O1S | x, y, z             | 0.83(3) | 2.14(3)  | 2.933(4) | 160(4)     |
| N5  | H5   | O2S | x, y, z             | 0.82(3) | 2.08(3)  | 2.847(3) | 155(3)     |
| N7  | H7A  | O2S | x, y, z             | 0.81(4) | 2.12(4)  | 2.869(4) | 154(4)     |
| O1S | H1S1 | N15 | x-1, y-1, z         | 0.84(4) | 2.09(5)  | 2.910(4) | 167(5)     |
| O1S | H1S2 | S1  | x-1, y, z           | 0.85(4) | 2.65(4)  | 3.483(3) | 174(5)     |
| O2S | H2S1 | N14 | 1+x, 1+y, z-1       | 0.85(4) | 2.02(4)  | 2.861(4) | 172(4)     |
| O2S | H2S2 | N15 | x, y, z-1           | 0.85(4) | 2.45(5)  | 3.045(4) | 128(4)     |
| O2S | H2S2 | N16 | 1+x, y, z-1         | 0.85(4) | 2.46(5)  | 3.003(4) | 123(4)     |

Table S10. Hydrogen bond geometry in **6**.

| D   | H    | A   | Symmetry code for A  | D-H, Å  | H...A, Å | D...A, Å | D-H...A, ° |
|-----|------|-----|----------------------|---------|----------|----------|------------|
| N1  | H1   | N15 | 1+x, y, z            | 0.82(2) | 2.18(2)  | 2.956(2) | 157(2)     |
| N6  | H6A  | N15 | 1+x, y, z            | 0.82(2) | 2.35(2)  | 3.058(2) | 146(2)     |
| N6  | H6B  | N16 | 1/2+x, 1/2-y, z-1/2  | 0.82(2) | 2.21(2)  | 2.975(2) | 155(2)     |
| N5  | H5   | N13 | -1/2-x, y-1/2, 1/2-z | 0.84(2) | 2.07(2)  | 2.869(2) | 159(2)     |
| N7  | H7A  | N13 | -1/2-x, y-1/2, 1/2-z | 0.83(2) | 2.42(2)  | 3.130(2) | 145(2)     |
| N7  | H7B  | S1  | -x, -y, -z           | 0.84(2) | 2.65(2)  | 3.495(1) | 178(1)     |
| C7  | H7   | S2  | 1/2+x, 1/2-y, 1/2+z  | 0.95    | 2.80     | 3.686(1) | 155        |
| C11 | H11C | N13 | -1/2-x, y-1/2, 1/2-z | 0.98    | 2.63     | 3.320(2) | 128        |
| O1S | H1S  | N12 | x, y, z              | 0.94(2) | 2.30(2)  | 3.202(2) | 160(2)     |

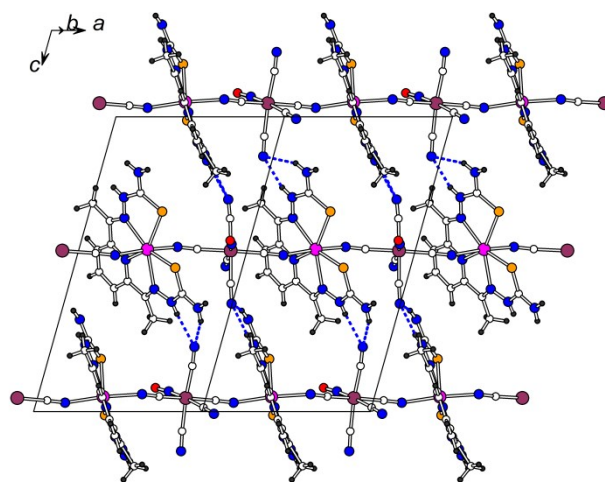

(a)

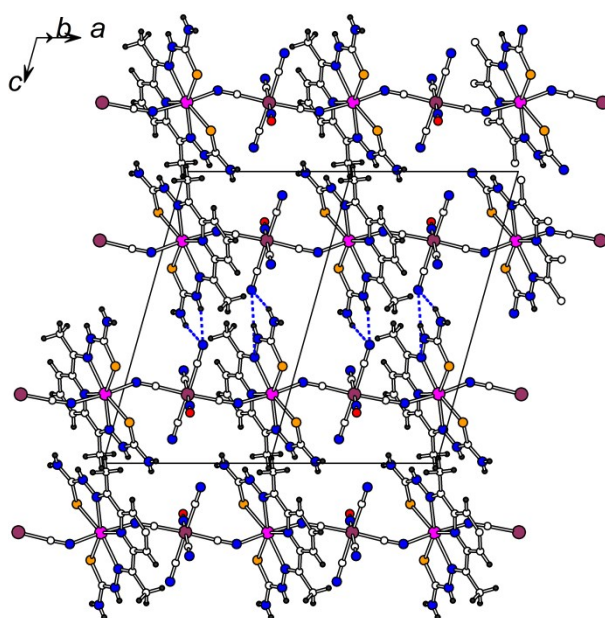

(b)

Fig. S4. View of the layer A (a) and B (b) along  $[-1\ 1\ 0]$  in the structure **3**. Intralayer N- $\text{H}_{2\text{daptsc}}\cdots\text{N}_{\text{NP}}$  hydrogen bonds are shown by dashed lines (see Table S7 for details).
